# Supplementary material for: Repeat-associated non-AUG translation induces cytoplasmic aggregation of CAG repeat-containing RNAs
Source: PubMed Central journal article supplement — Proc Natl Acad Sci U S A. 2023 Jan 9;120(3):e2215071120. doi: 10.1073/pnas.2215071120 (PMC9934169; doi:10.1073/pnas.2215071120), 2023-01-09
Supplement: pnas.2215071120.sapp.pdf [file pnas.2215071120.sapp.pdf]

**Supporting Information for:**

**Repeat-associated non-AUG translation causes cytoplasmic aggregation of CAG repeat-containing RNAs and induces cellular toxicity in human cells**

Michael R. Das<sup>1, 2</sup>, Yeonji Chang<sup>1</sup>, Rachel Anderson<sup>1,2</sup>, Reuben Saunders<sup>3</sup>, Nan Zhang<sup>3</sup>, Colson Tomberlin<sup>1</sup>, Ronald D. Vale<sup>3, 4, 5</sup>, and Ankur Jain<sup>1, 2,\*</sup>

Corresponding author: Ankur Jain

Email: [ajain@wi.mit.edu](mailto:ajain@wi.mit.edu)

**This PDF file includes:**

Supporting text  
Figures S1 to S6  
Table S1  
Legends for Movies S1 to S5  
Legend for Datasets S1

**Other supporting materials for this manuscript include the following:**

Movies S1 to S5  
Dataset S1

## Supporting Information Text

### Supplemental Discussion

The MS2 system for RNA visualization requires incorporation of multiple MS2 stem loops, and the target RNA is indirectly visualized upon the binding of multiple fluorescent protein tagged MS2-coat proteins (1). Previous reports have shown that the MS2 tag can affect RNA degradation and promote its accumulation at P-bodies in yeast (2–5). These caveats need to be considered when using this system for assessing RNA localization. We previously showed that under our expression scheme, control RNAs (encoding mCherry or a non-coding sequence - reverse complement of mCherry) that were tagged with 12xMS2 hairpins and co-expressed with MS2CP-YFP did not form appreciable inclusions in the nucleus or in the cytoplasm of U-2OS cells (6).

The MS2 system detects RNA indirectly through MS2CP-YFP, and thus any localization patterns could potentially be caused by the reporter itself, rather than the RNA. In particular, the fluorescent proteins used for indirect RNA visualization, such as GFP, are prone to oligomerization (7), which may potentiate unwarranted aggregation of the MS2-tagged RNA. We used a monomerized mutant of YFP (A206K) that substantially reduces the dimerization propensity of YFP (7). Nevertheless, the high local concentration of fluorescent proteins at nuclear foci or cytoplasmic aggregates may exaggerate RNA aggregation. To further confirm that the observed sub-cellular localization of CAG repeat containing RNA is not driven by the MS2-tag, we performed control experiments using CAG repeat-containing RNAs lacking the MS2-tag and expressed these RNAs in a cell line without the co-expression of MS2CP-YFP. We observed similar localization patterns of RAN-translated CAG repeat RNA with and without the MS2-tag as assessed in fixed cells using FISH (Fig. S1D-E). We also observed comparable effects on the mislocalization of RNA binding proteins (Fig. S3E-F), RAN protein production (Fig. S2E), and cell toxicity (Fig. S4D-E) when expressing tagged or untagged RNA.

**Fig. S1****A**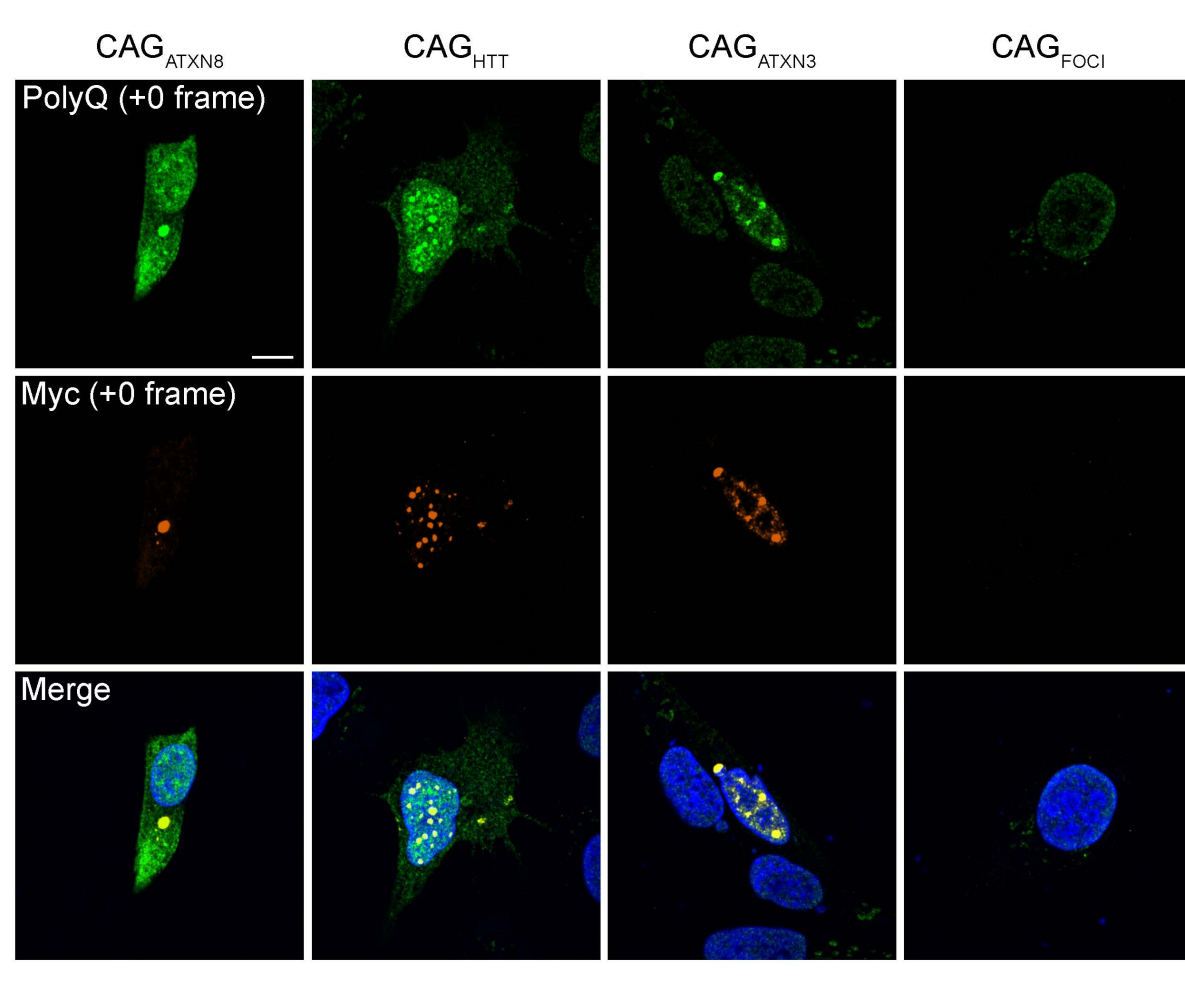**B**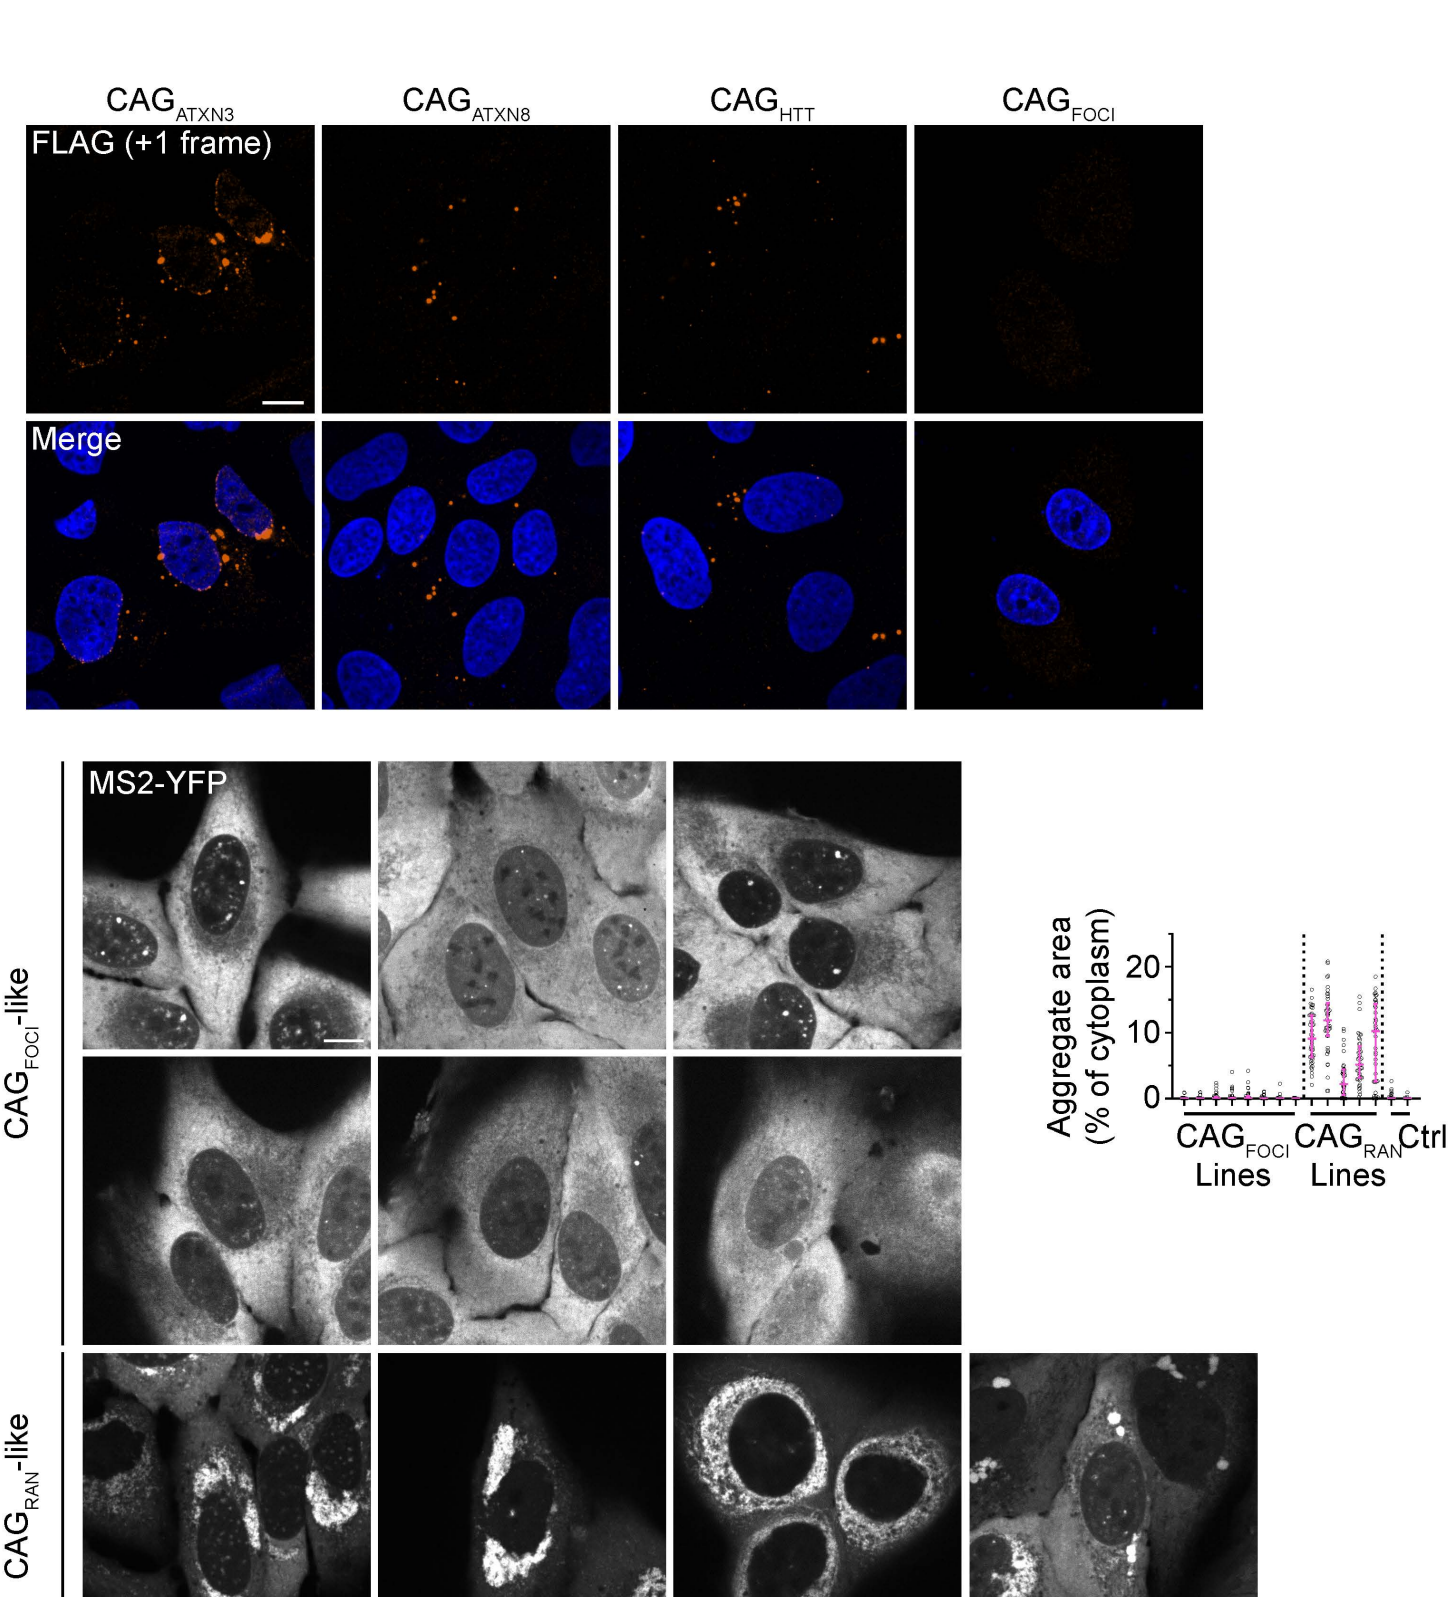**C**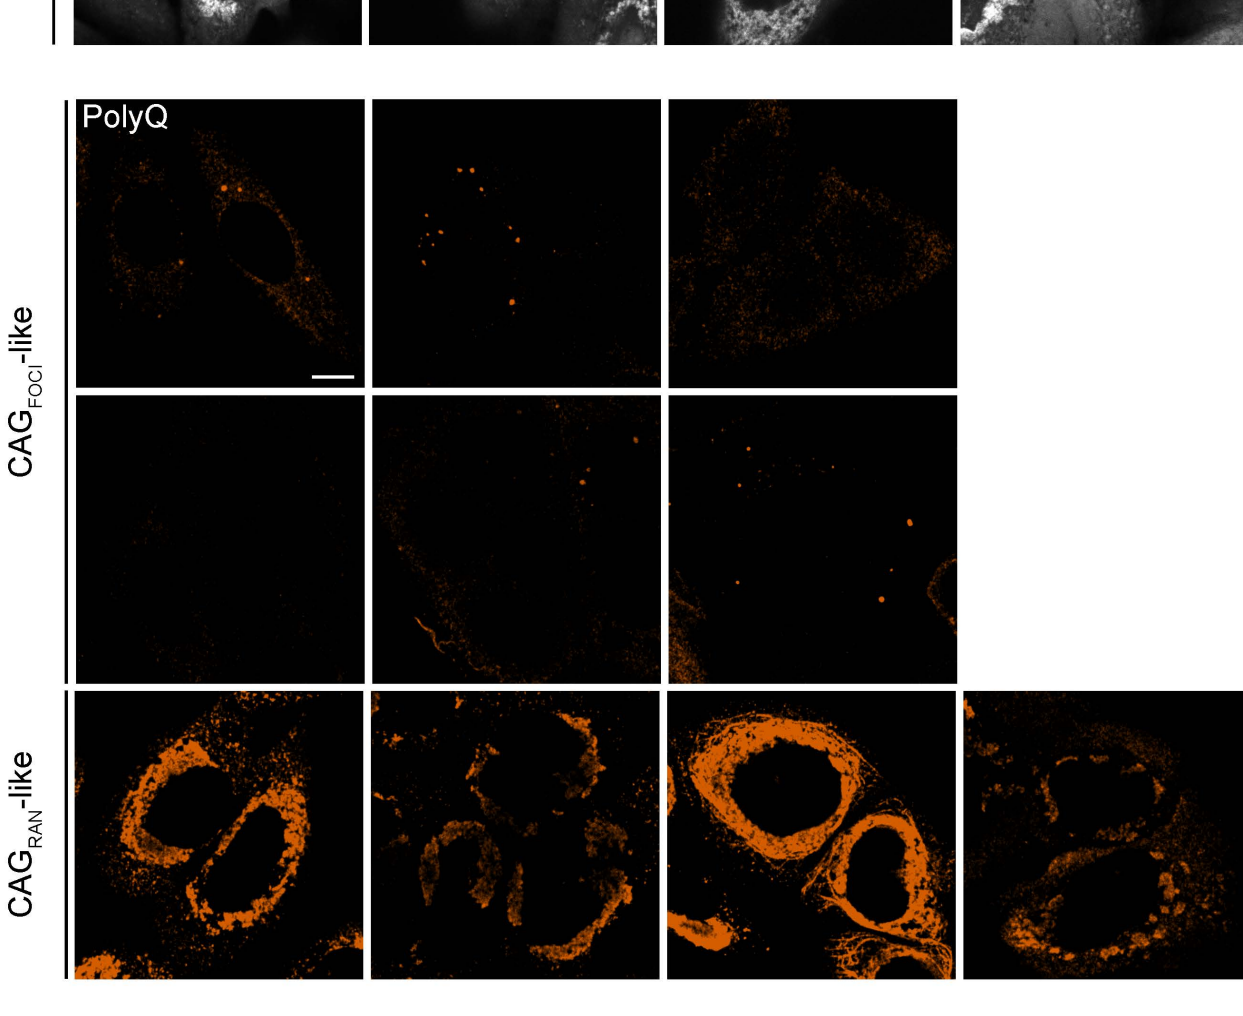**D**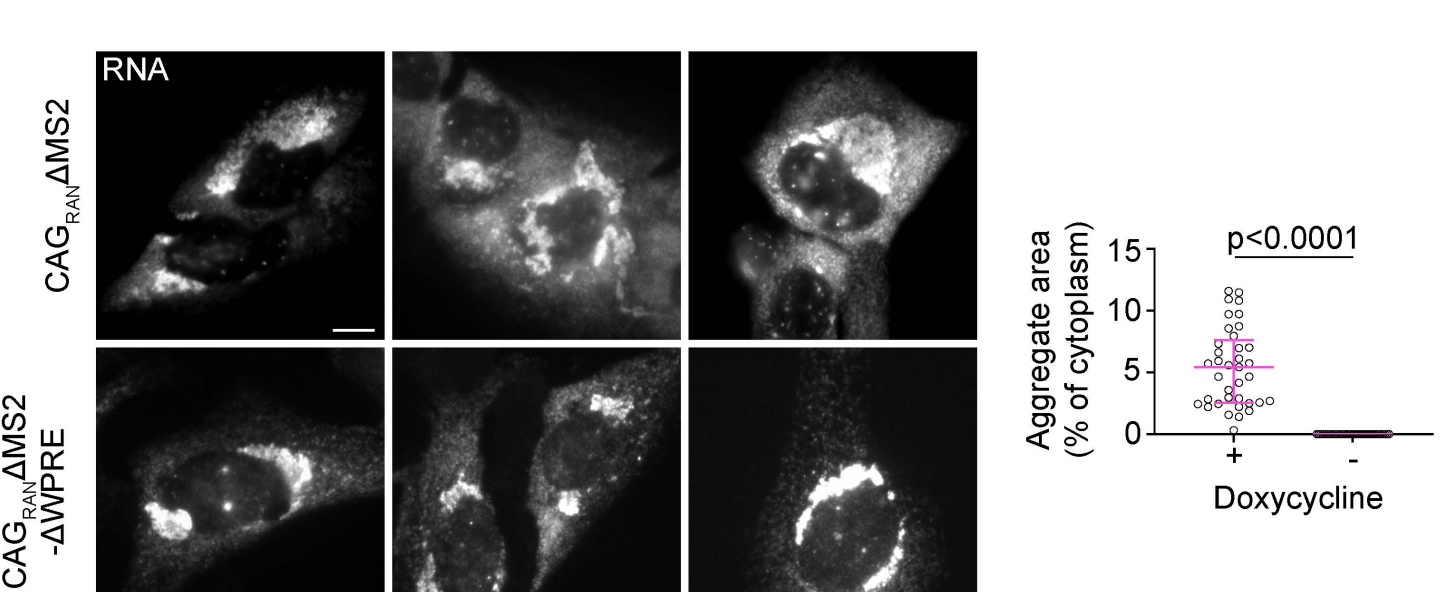**E**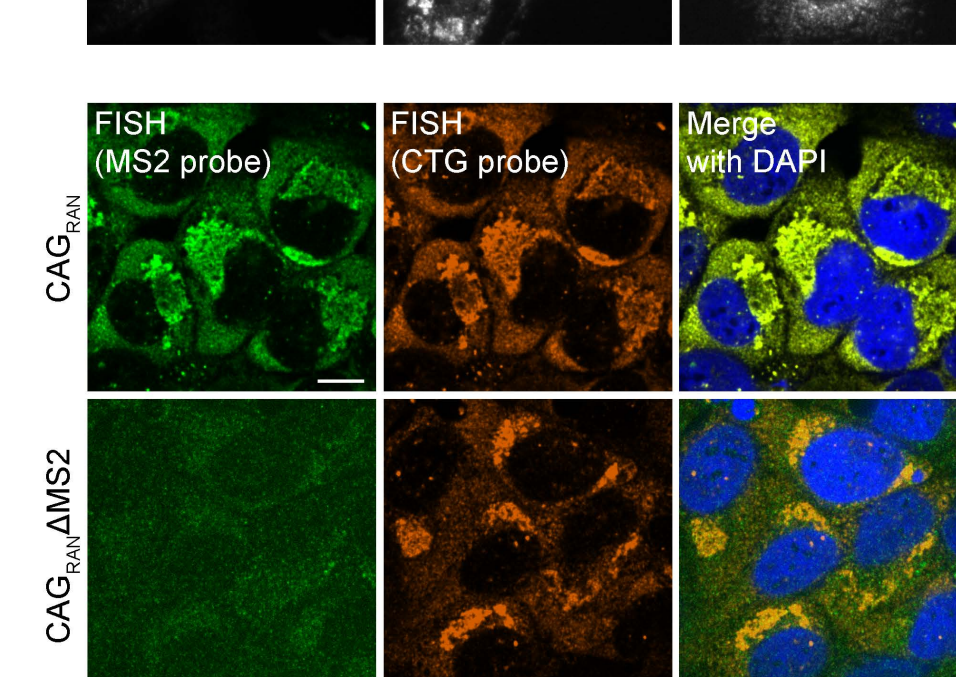**F**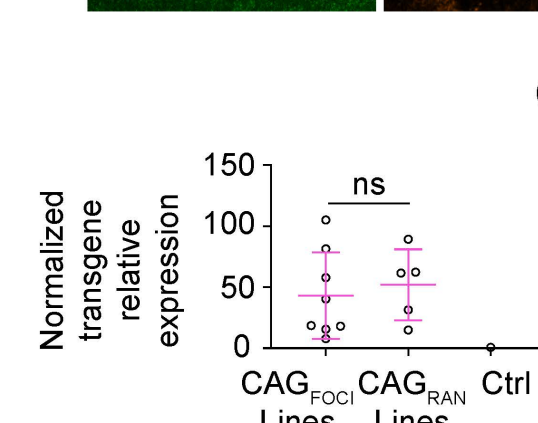**G**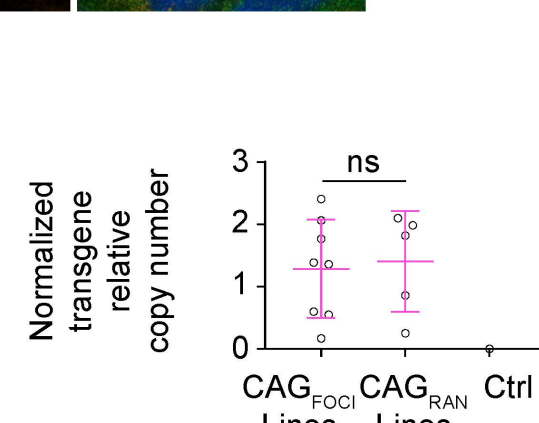**H**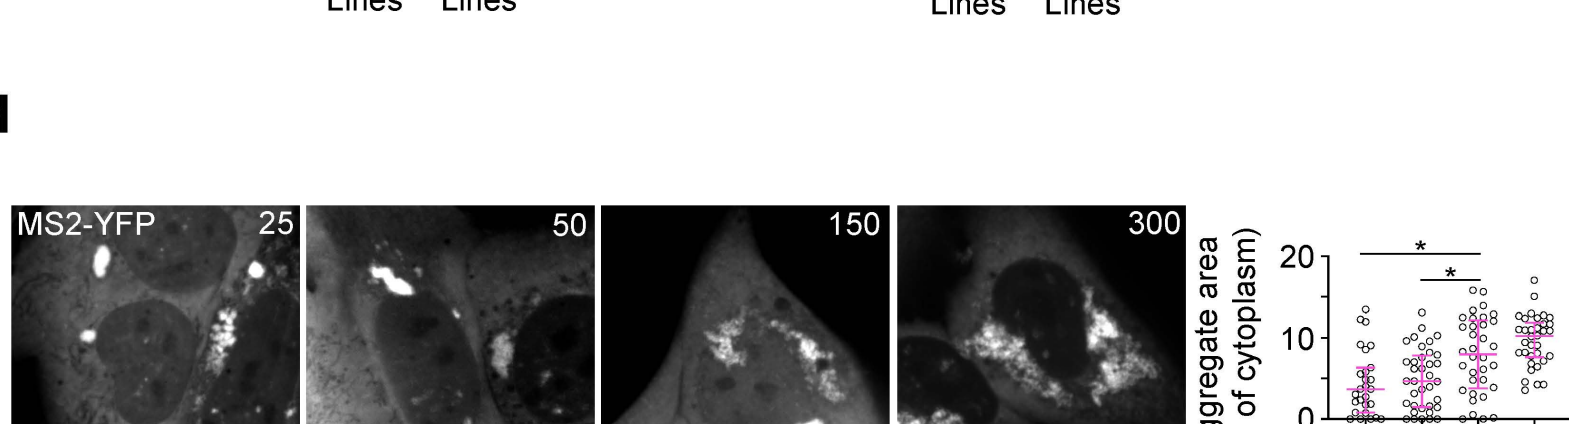**I**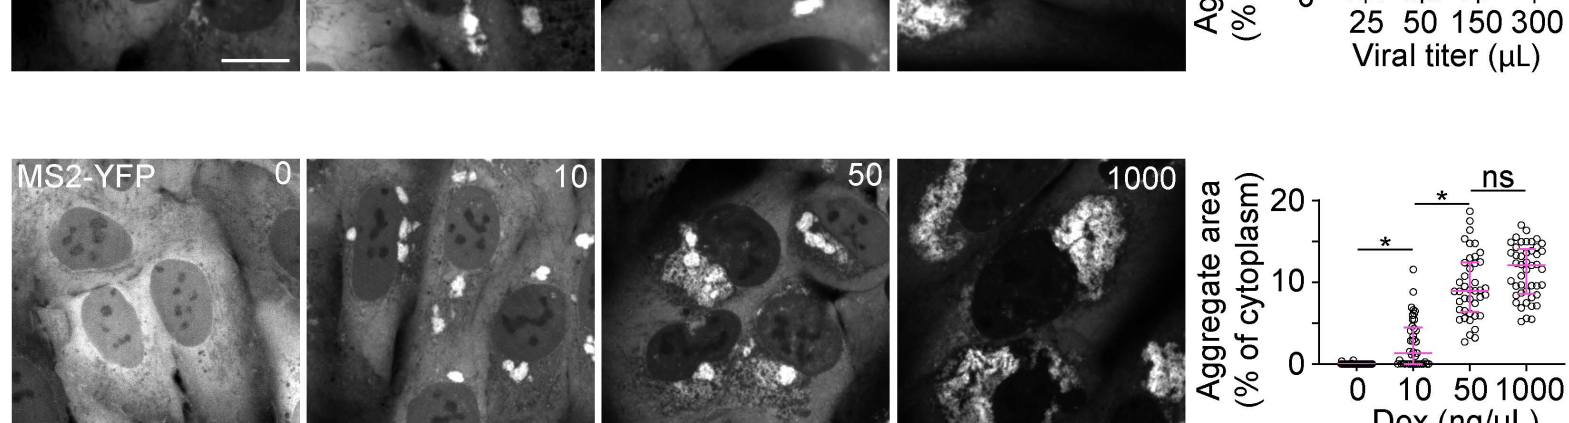**J**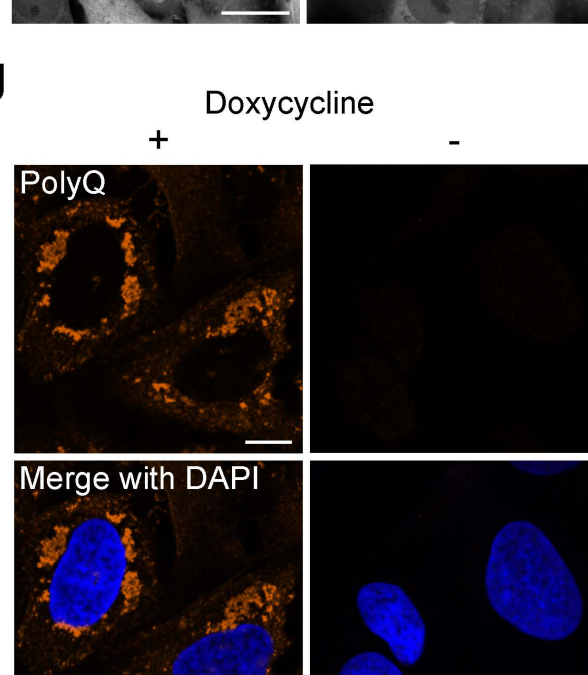

**Fig. S1.** A, Representative immunofluorescence micrographs showing U-2OS cells transiently transfected for 48 h with the stated constructs. Cells were stained with PolyQ, Myc, or Flag antibodies and counterstained with DAPI. B, Representative micrographs from cells with CAG<sub>FOCI</sub>-like and CAG<sub>RAN</sub>-like phenotypes (left). Images are independently scaled. Quantification of cytoplasmic aggregate area (right). Each data point represents a single cell and data are summarized as median  $\pm$  interquartile range. Control cells are expressing constructs containing mCherry mRNA or the reverse complement of mCherry, each fused to the MS2 tag. C, Representative immunofluorescence micrographs after staining CAG<sub>FOCI</sub>-like and CAG<sub>RAN</sub>-like cells with antibodies binding polyglutamine-containing proteins. Images are scaled equally. D, Representative micrographs of cells expressing CAG<sub>RAN</sub> with deletions of the MS2 tag (left, top row) or deletions of both the MS2 tag and the WPRE (left, bottom row). Cells were stained with RNA (MS2 tag) or deletions of the CAG repeats. Images are independently scaled, and three cells are shown for each condition. Corresponding quantification of aggregate area in cells expressing CAG<sub>RAN</sub> with deletions to the MS2 tag (right). Each point represents a single cell and data are summarized as median  $\pm$  interquartile range. Significance was calculated using Mann-Whitney U-test. E, Representative micrographs of cells expressing either CAG<sub>RAN</sub> or CAG<sub>RAN</sub> lacking the MS2 tag for 24 h. Cells were stained with probes targeting the MS2 tag (green) or the CAG repeats (vermillion) and counterstained with DAPI (blue). Images are independently scaled. F-G, Quantification of transgene expression (F) and transgene copy number (G) across cell lines represented by CAG<sub>FOCI</sub> and CAG<sub>RAN</sub> constructs. Expression levels are normalized to Actin. Each point represents a cell line which is the average from two separate RNA (F) or DNA (G) extractions. Control cells were uninduced cells that contain a construct separable of forming RNA aggregates upon induction (F) or cells were not transfected with repeat constructs (G). Data are summarized as mean  $\pm$  s.d. Asterisks denote significance by Student's t-test. H-I, Representative micrographs (left) of cells expressing CAG<sub>RAN</sub> for 24 hours at the stated viral titers ( $\mu$ L of virus, H) or doxycycline concentrations ( $\mu$ g/mL, I). Images are independently scaled. Corresponding quantifications are shown on the right. Each data point represents a single cell and data are summarized as median  $\pm$  interquartile range of  $\geq$  25 cells. Asterisks indicate significance by Mann-Whitney test. J, Representative immunofluorescence micrographs showing polyglutamine staining in cells expressing CAG<sub>RAN</sub> lacking the MS2 hairpin tag for 24 h. Cells were counterstained with DAPI. Images are representative of  $\geq$  40 cells. All scale bars, 10  $\mu$ m.

**Fig. S2.**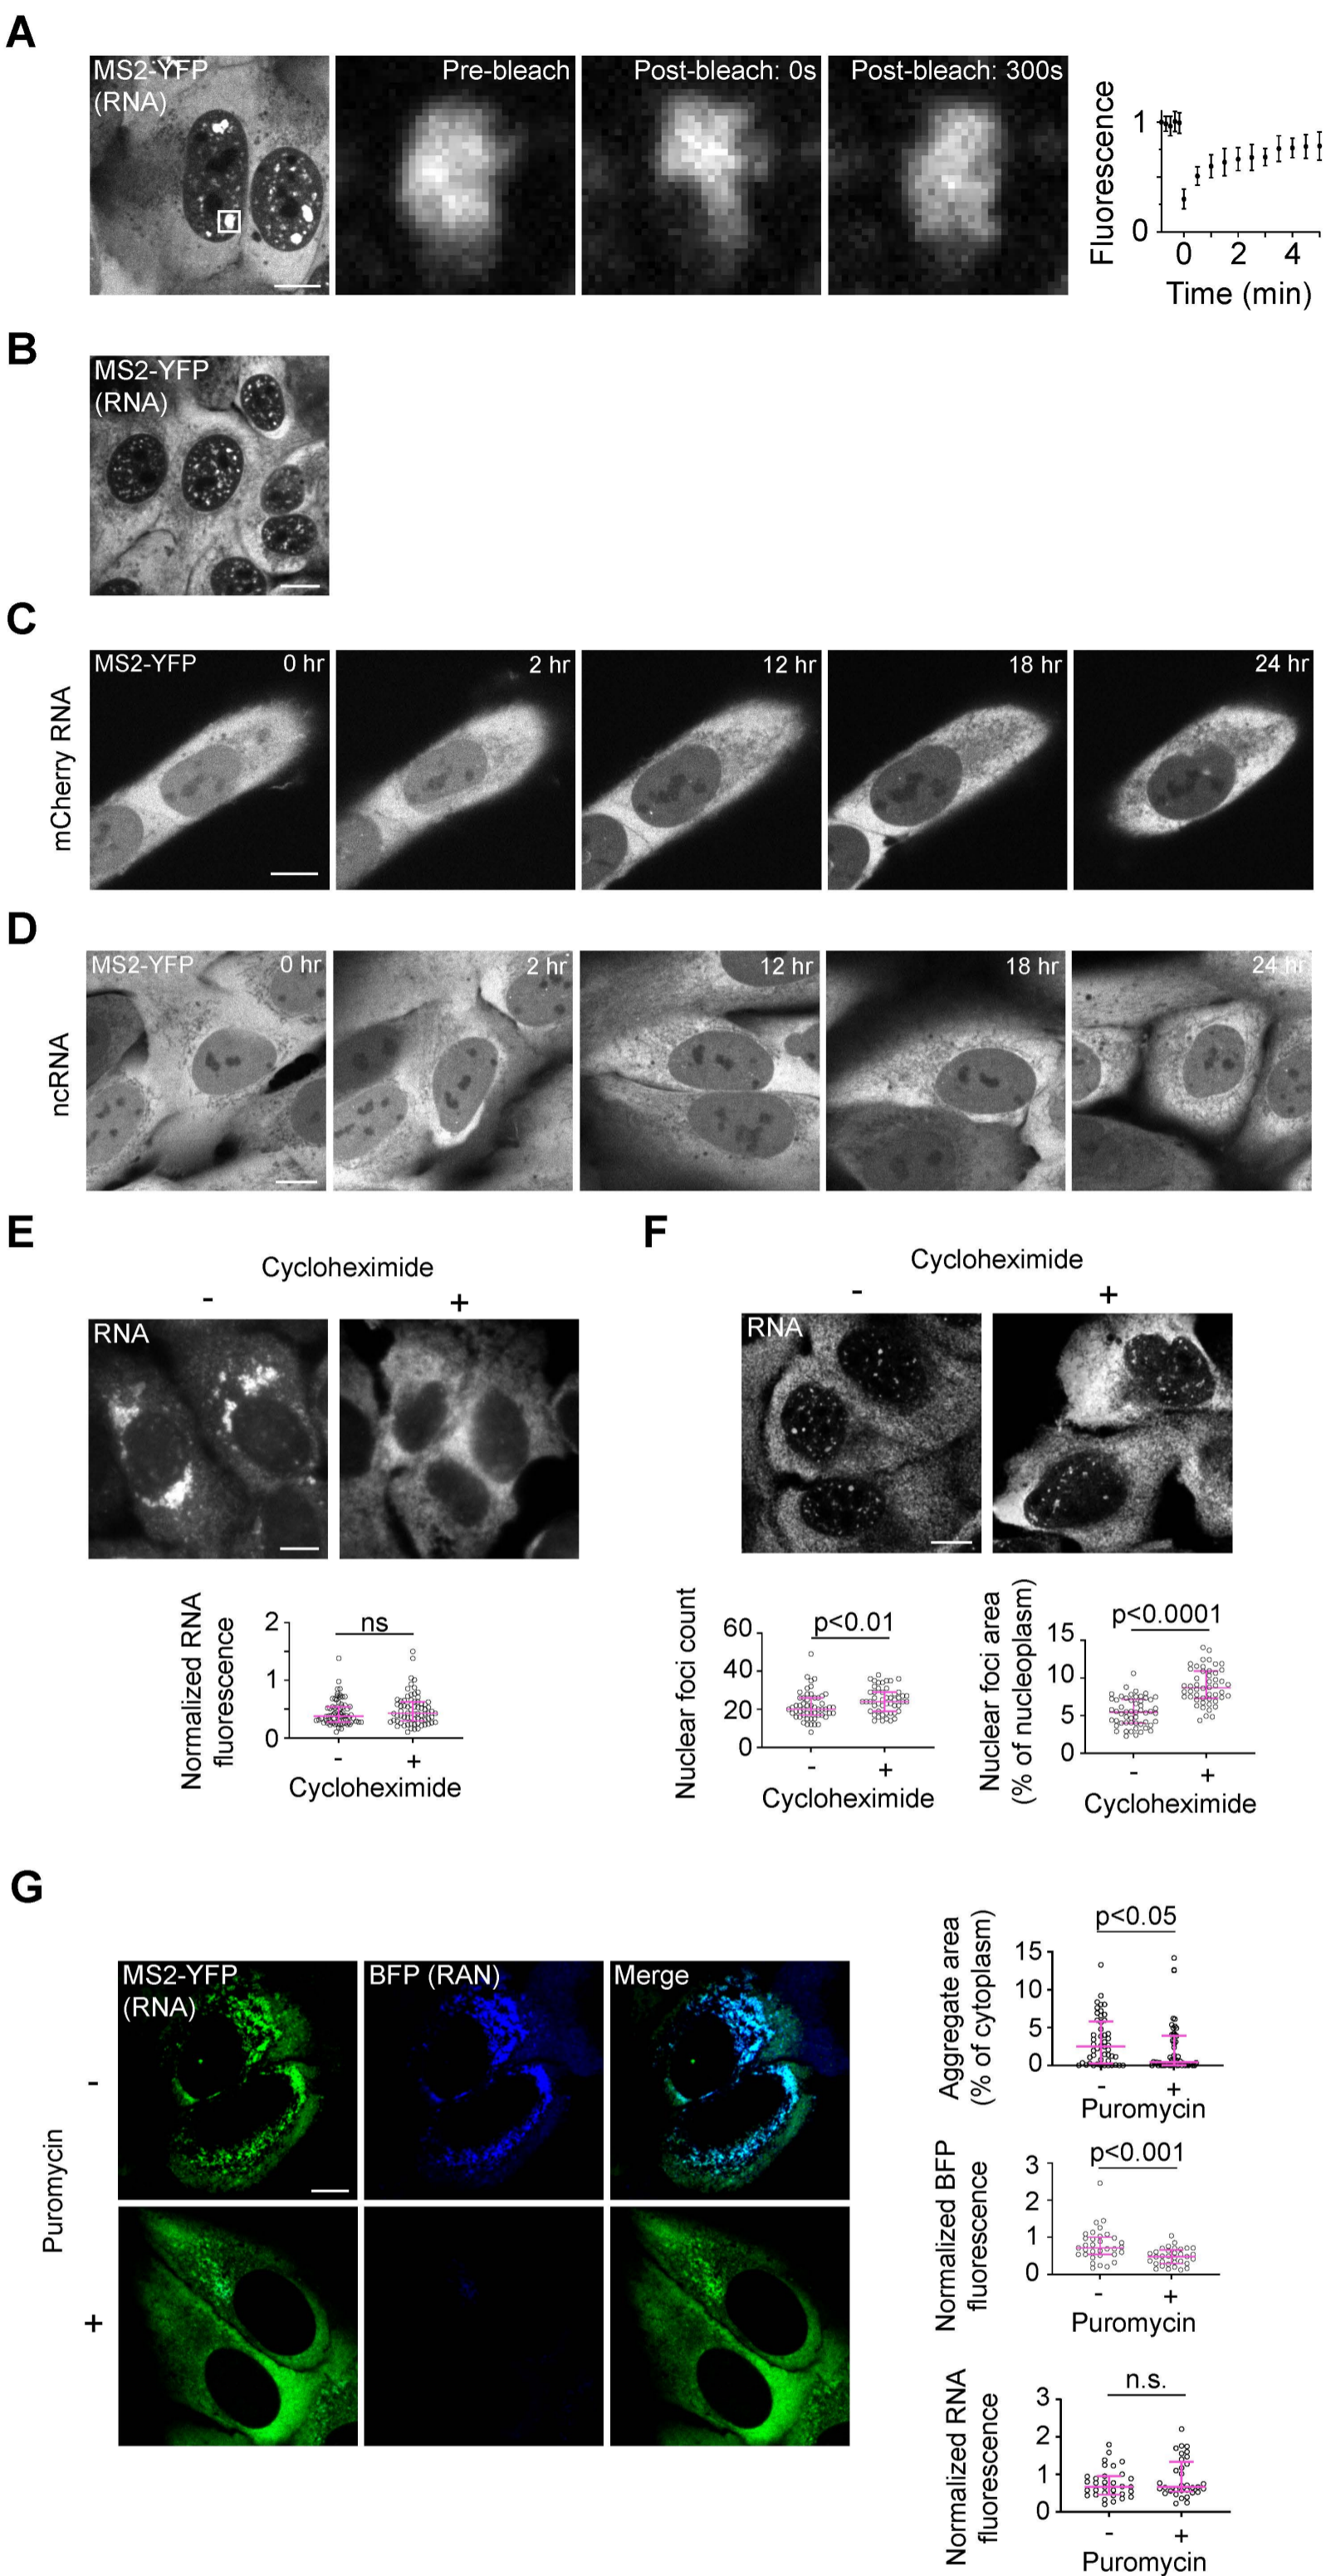

**Fig. S2.** A, Representative micrographs from a cell expressing  $CAG_{RAN}$  for 1 h (left). Inset shows a nuclear focus prior to and at the stated times after photobleaching. Data are representative of  $\geq 10$  events. Images are independently scaled. FRAP trajectory is shown with data represented as mean  $\pm$  standard deviation (right). B, Representative micrograph from cells expressing  $CAG_{FOCI}$  for 6 d. Data is representative of  $\geq 40$  cells. C-D, Representative micrographs from cells expressing mCherry mRNA (C) and the reverse complement of mCherry (D) for the stated amounts of time. Data are representative of  $\geq 4$  movies. E, Representative micrographs of cells expressing  $CAG_{RAN}$  for 12 h (control) or expressing  $CAG_{RAN}$  for 12 h in the presence of cycloheximide (10  $\mu$ g/mL) (top). Cells were stained with RNA FISH probes targeting the repeat RNA. Quantification of RNA levels normalized to cell area (bottom). Each point represents a single cell and data are summarized as median  $\pm$  interquartile range. F, Representative micrographs of cells expressing  $CAG_{FOCI}$  for 12 h (control) or expressing  $CAG_{FOCI}$  for 12 h in the presence of cycloheximide (10  $\mu$ g/mL) (left). Cells were stained with RNA FISH probes targeting the repeat tract. Quantification of RNA foci count and area (right). Each point represents a single cell and data are summarized as median  $\pm$  interquartile range. G, Representative micrographs of cells expressing  $CAG_{RAN}$  BFP for 12 h (control) or expressing  $CAG_{RAN}$  BFP for 12 h in the presence of puromycin (10  $\mu$ g/mL) (left). MS2-YFP images are independently scaled; BFP images are scaled equally. Quantification of cytoplasmic RNA aggregate area (right, top graph), BFP fluorescence normalized to cell area (right, middle graph), and RNA FISH fluorescence normalized to cell area (right, bottom graph). Each data point represents a single cell and data are summarized as median  $\pm$  interquartile range. Significance was calculated by Mann-Whitney U-test. All scale bars, 10  $\mu$ m.

**Fig. S3.****A**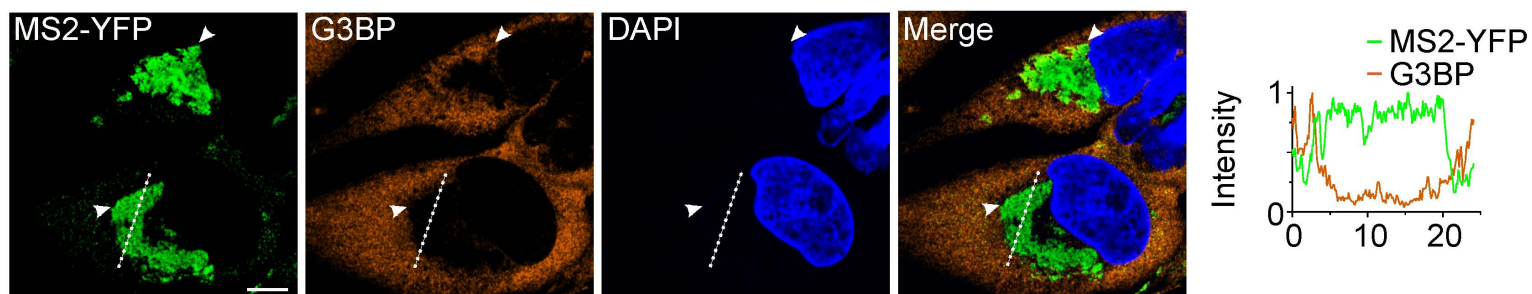**B**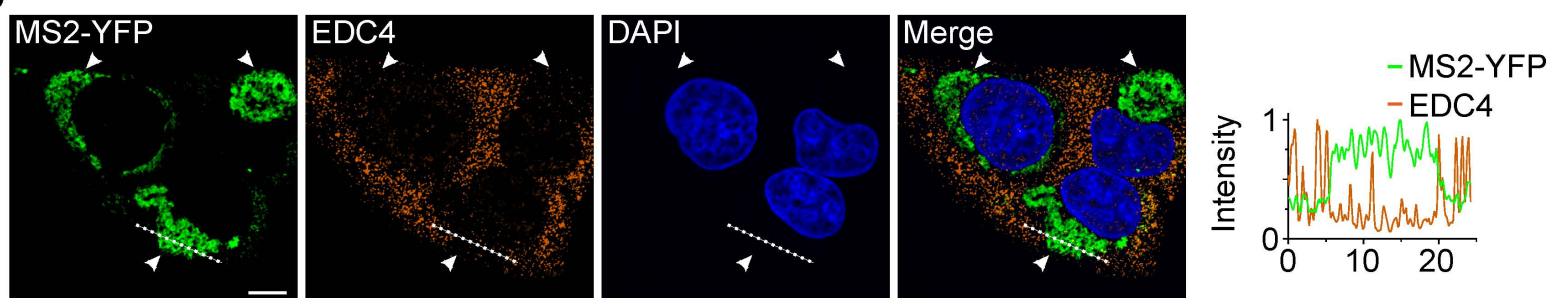**C**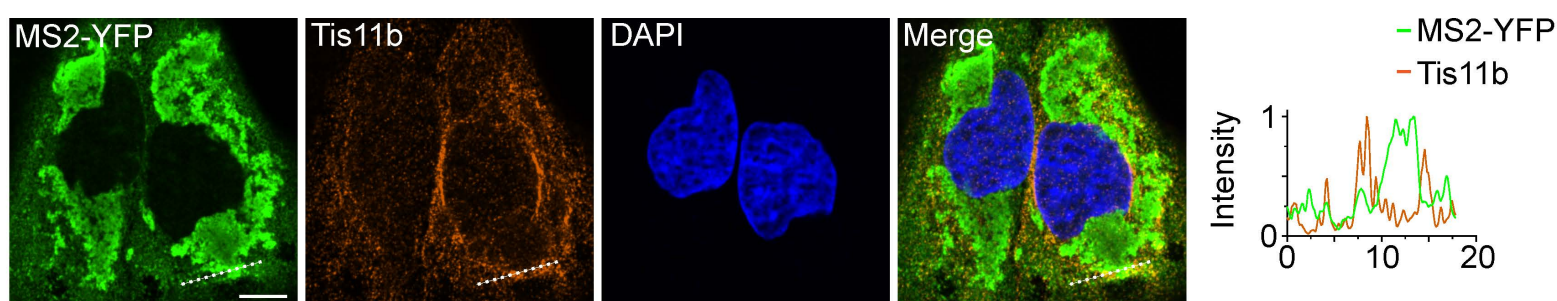**D**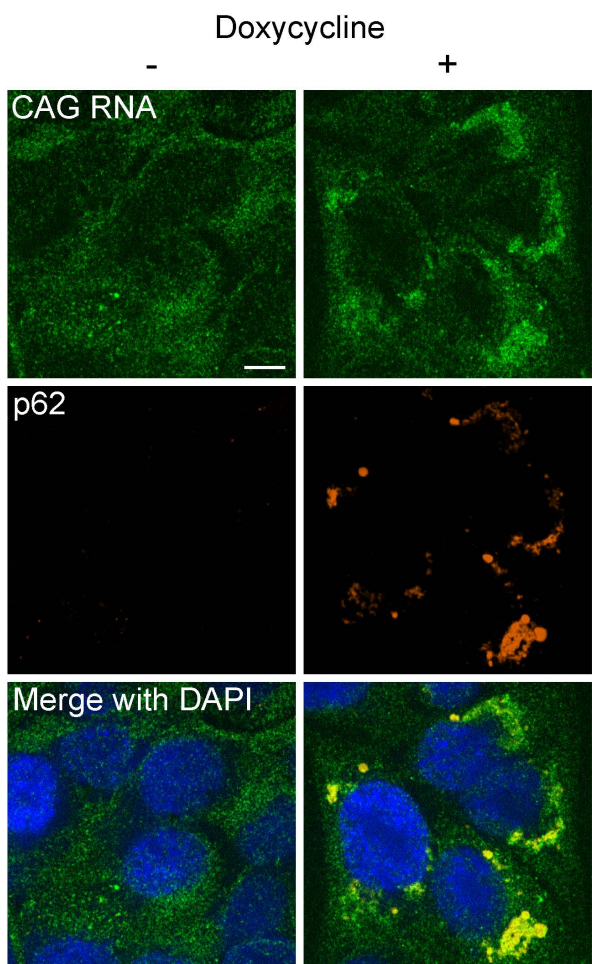**E**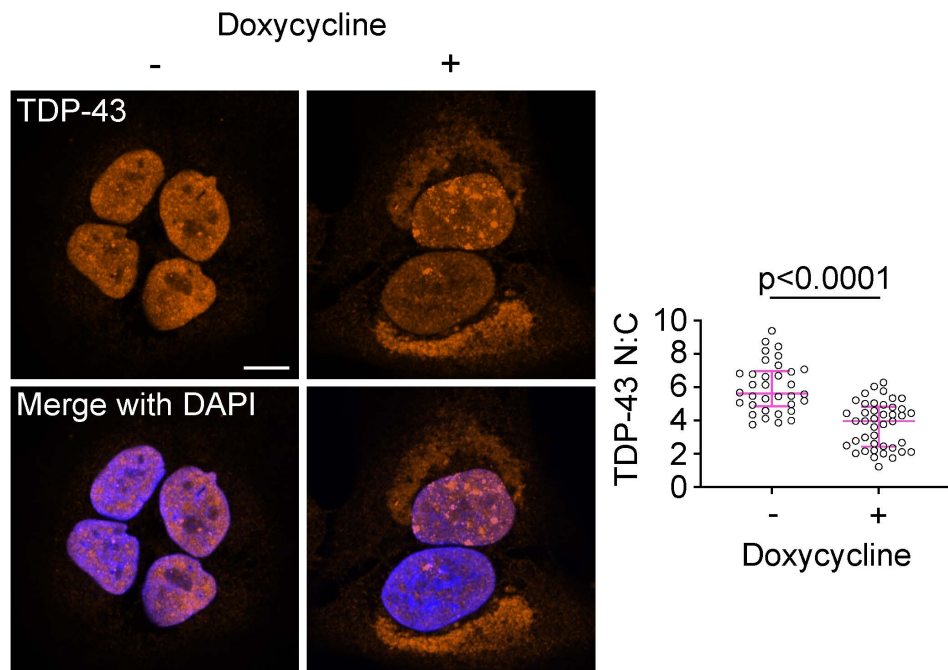**F**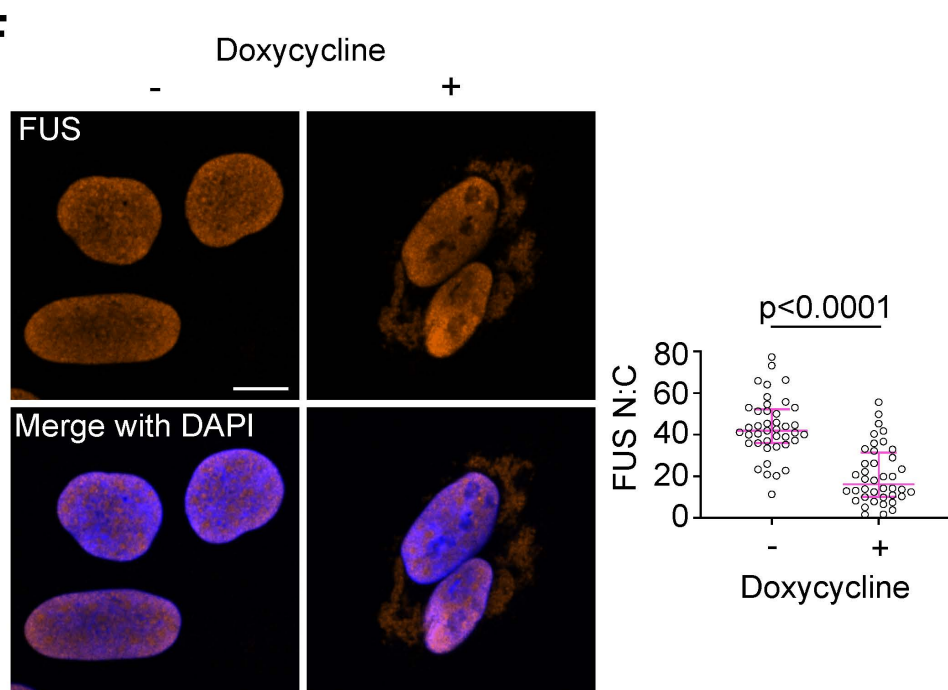

**Fig. S3.** A-C, Representative immunofluorescence micrographs of cells expressing CAG<sub>RAN</sub> for 24 h (left). Cells were stained with antibodies against G3BP (A), EDC4 (B), and Tis11b (C) and were counterstained with DAPI. Intensity profiles of MS2-YFP and the stated epitopes along the dashed lines in the micrographs (right). D, Dual-IF FISH micrographs showing p62 protein localization and weak staining of CAG repeat RNA in cells expressing CAG<sub>RAN</sub> lacking the MS2 tag for 24 h. Cells were fixed with glyoxal, stained with p62 antibodies, refixed with glyoxal, and then stained with FISH probes targeting the repeat region. Cells were counterstained with DAPI. E-F, Representative immunofluorescence micrographs of cells expressing CAG<sub>RAN</sub> lacking the MS2 tag for 24 h or uninduced control cells (left). Cells were stained with antibodies against TDP-43 (E) or FUS (F) and counterstained with DAPI. Quantification of nuclear to cytoplasmic ratio of each protein (right). Each datapoint represents a single cell. Data are summarized as median  $\pm$  interquartile range. Significance values were calculated using Mann-Whitney U-tests. All scale bars, 10  $\mu$ m.

**Fig. S4.****A**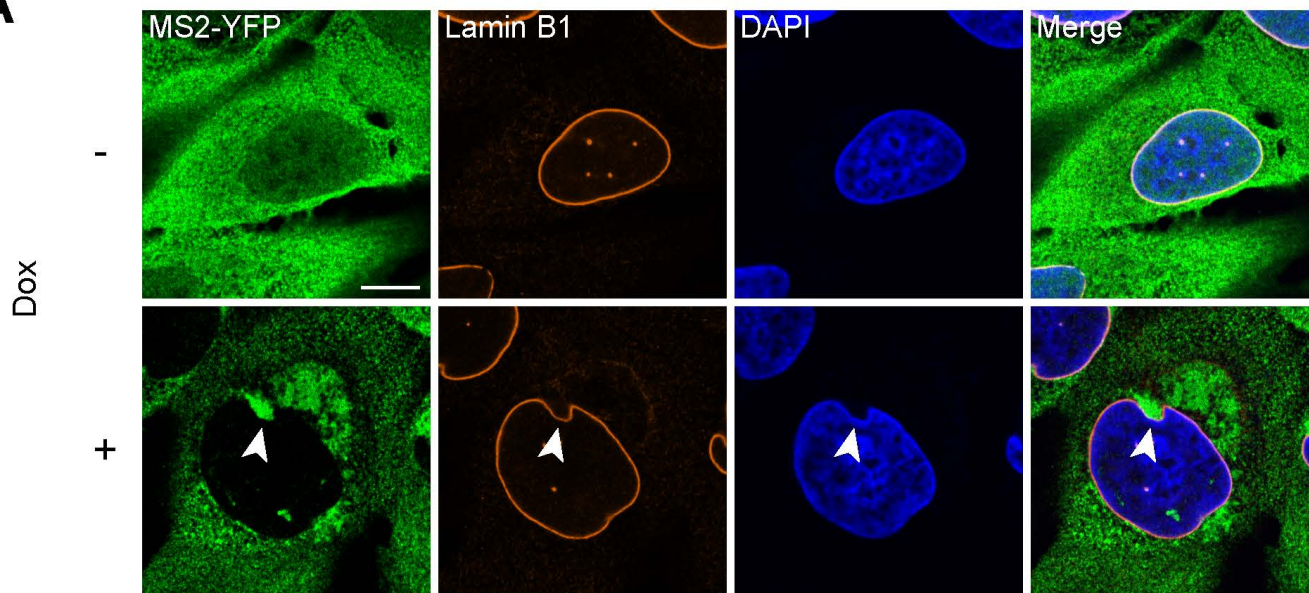**B**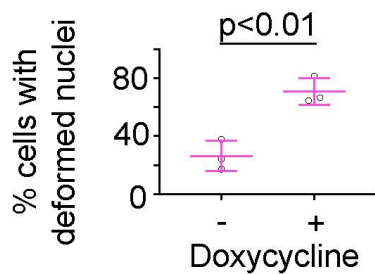**C**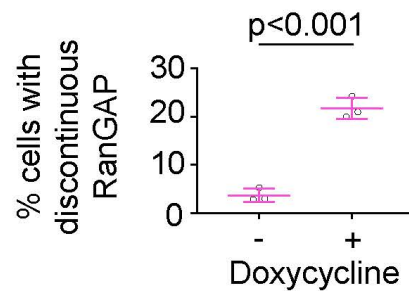**D**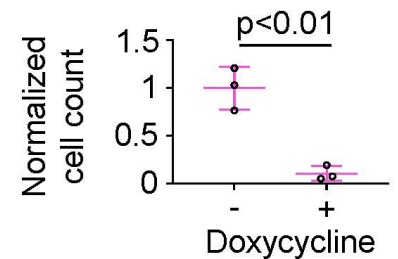**E**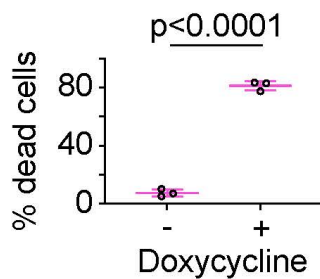**F**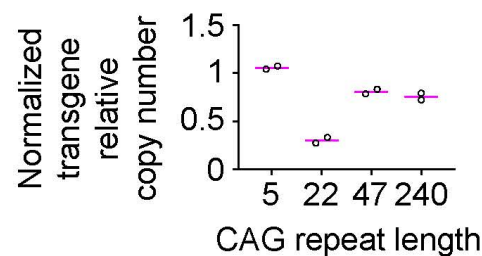

**Fig. S4.** A, Immunofluorescence micrographs showing localization of lamin B1 and MS2-YFP in uninduced control cells and in cells expressing CAG<sub>RAN</sub> for 24 h. Arrowheads denote representative point of nuclear deformation. MS2-YFP images are independently scaled; lamin images are scaled equally. Immunofluorescence data are representative of 3 independent experiments, each of  $\geq 30$  cells. B-C, Quantification of cells with deformed nuclei as assessed by immunofluorescence staining for lamin (B) and discontinuous RanGAP1 staining (C) after expression of CAG<sub>RAN</sub> lacking the MS2 tag for 24 h. Each datapoint represents  $\geq 30$  cells and data are summarized as mean  $\pm$  s.d. Significance value was calculated by Student's t-test. D, Quantification of cell populations after expressing CAG<sub>RAN</sub> lacking the MS2 tag for 4 days. Each point represents a separate well (biological replicate) and is the summary of at least two technical replicate measurements. Cell counts are normalized to uninduced controls. Data are summarized as mean  $\pm$  s.d. Significance value was calculated by Student's t-test. E, Quantification of cell death caused by expression of CAG<sub>RAN</sub> lacking the MS2 tag for 4 days, as measured by Trypan Blue staining. Each point represents a separate well and is the summary of at least two technical replicate measurements. Data are summarized as the mean of the three well replicates (biological replicates). F, Quantification of integration efficiency across cell lines expressing variations of CAG<sub>RAN</sub> with varying lengths of the CAG repeat tract. Copy numbers were normalized to Actin. Each data point represents a separate DNA extraction. Data are summarized as mean. All scale bars, 10  $\mu$ m.

# Fig. S5.

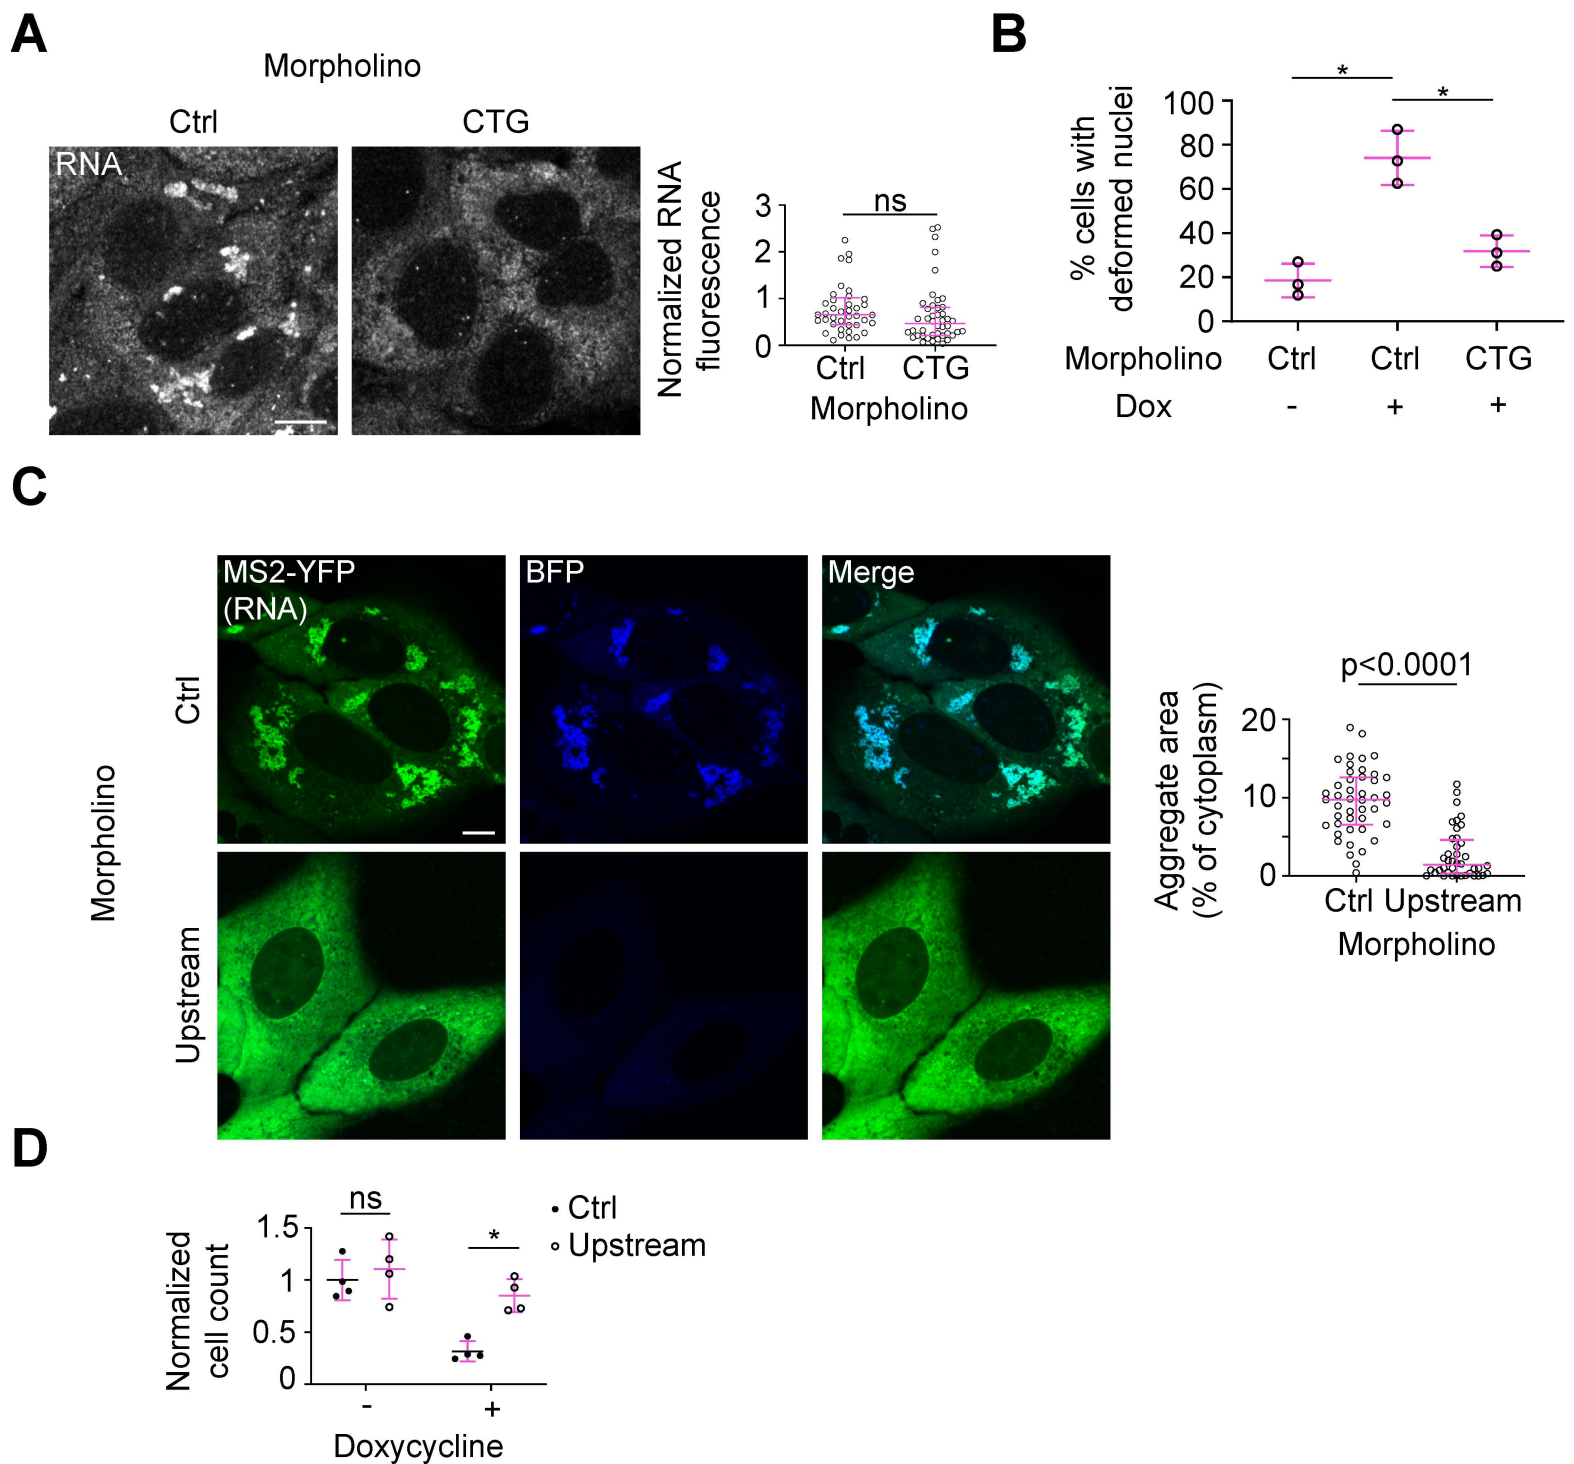

**Fig. S5.** A, Representative micrographs of cells expressing  $CAG_{RAN}$  for 24 h in the presence of either a control morpholino or a morpholino targeting the CAG repeat tract (morpholino concentration 50  $\mu$ M) (left). Cells were stained with RNA FISH probes targeting the MS2 tag. Quantification of RNA levels normalized to cell area (right). Each point represents a single cell and data are summarized as median  $\pm$  interquartile range. B, Quantification of cells with deformed nuclei expressing  $CAG_{RAN}$  for 24 h treated with morpholinos as in (A). Each data point represents  $\geq 30$  cells across  $\geq$  independent experiments. Data are summarized as mean  $\pm$  standard deviation. Significance was calculated by Student's t-test. C, Representative micrographs of cells expressing  $CAG_{RAN}$  BFP for 24 h and treated with either a control morpholino or a morpholino targeting the region upstream of the CAG repeat tract (morpholino concentration 50  $\mu$ M) (left). MS2-YFP images are independently scaled; BFP images are scaled equally. Quantification of cytoplasmic RNA aggregate area (right). Each point represents a single cell. Data are summarized as median  $\pm$  interquartile range. Significance value is calculated by Mann-Whitney U-test. D, Quantification of cell survival after four days of  $CAG_{RAN}$  expression in the presence of either a control morpholino or a morpholino targeting the region upstream of the repeat tract. Each data point represents data from one well measured with at least two technical replicates. Data are summarized as the mean  $\pm$  s.d. Asterisks denote significance by Student's t-test. All scale bars, 10  $\mu$ m.

**Fig. S6.**

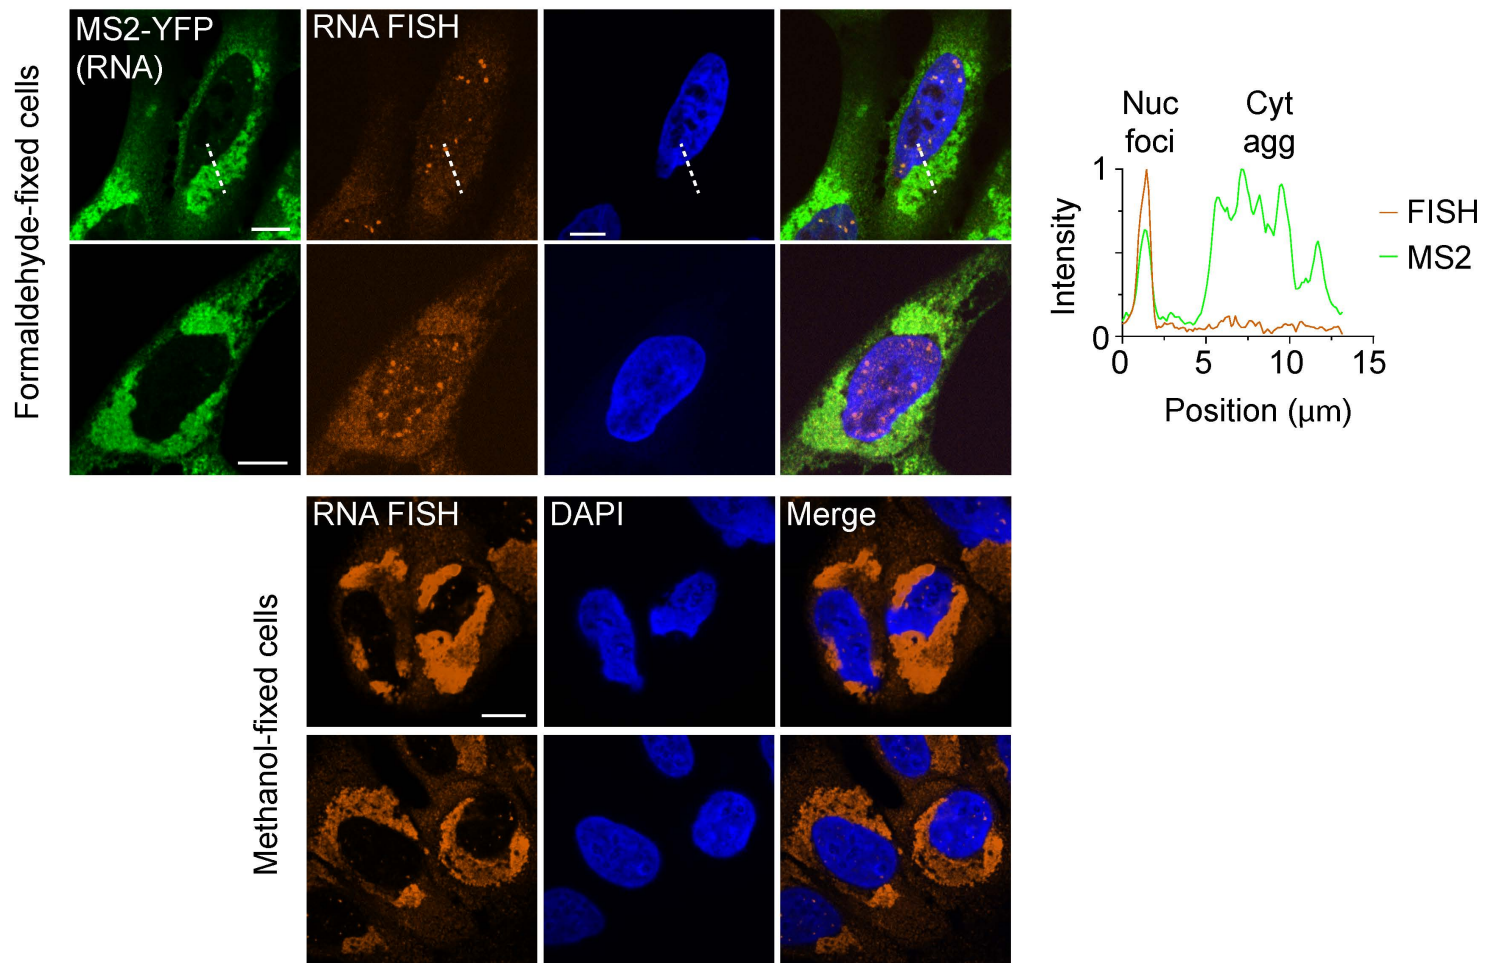

**Fig. S6.** Fluorescence micrographs of cells expressing  $CAG_{RAN}$  for 24 h fixed with formaldehyde and stained with RNA FISH probes (top, left). Intensity profile showing RNA intensities as detected by MS2-YFP (green) and by RNA FISH (vermillion) (top, right). Regions of the line corresponding to a nuclear focus and a cytoplasmic aggregate are labelled. Fluorescence micrographs of cells expressing  $CAG_{RAN}$  for 24 h fixed with a methanol fixation solution and stained with RNA FISH probes. MS2-YFP is not shown as methanol denatures and prevents fluorescence detection of the protein. All scale bars, 10  $\mu\text{m}$ .



**Table S1.** List of reagents and resources used in this study

| REAGENT or RESOURCE                           | SOURCE                    | IDENTIFIER       |
|-----------------------------------------------|---------------------------|------------------|
| Antibodies                                    |                           |                  |
| Rabbit anti-lamin B1                          | Abcam                     | Cat#ab16048      |
| Mouse anti-G3BP                               | Abcam                     | Cat#ab56574      |
| Rabbit anti-EDC4                              | Abcam                     | Cat#ab72408      |
| Mouse anti-p62/SQSTM1                         | Abcam                     | Cat#ab56416      |
| Rabbit anti-TDP-43                            | Proteintech               | Cat#10782-2-AP   |
| Rabbit anti-FUS                               | Invitrogen                | Cat#PA552610     |
| Rabbit anti-TIS11b/ZFP36L1                    | Abcam                     | Cat#ab230507     |
| Goat anti-GFP                                 | Rockland                  | Cat#600-101-215  |
| Mouse anti-polyglutamine                      | Millipore-Sigma           | Cat#MAB1574      |
| Alexa488-conjugated donkey anti-goat          | Invitrogen                | Cat#A11055       |
| Cy3-conjugated donkey anti-mouse              | Jackson<br>ImmunoResearch | Cat#715-165-151  |
| HRP-conjugated rabbit anti-mouse              | Sigma-Aldrich             | Cat#A9044-2ML    |
| Cy3-conjugated donkey anti-rabbit             | Jackson<br>ImmunoResearch | Cat#711-165-152  |
| Bacterial and virus strains                   |                           |                  |
| Stbl3 <i>E. coli</i>                          | Invitrogen                | Cat#C7373-03     |
| Biological samples                            |                           |                  |
| Chemicals, peptides, and recombinant proteins |                           |                  |
| EndoPorter peptide                            | GeneTools                 | SKU: OT-EP-PEG-1 |
| Methanol                                      | Millipore-Sigma           | Cat#MX0475-1     |
| Acetic acid                                   | Sigma-Aldrich             | Cat#695092       |
| UltaPure 20X SSC Buffer                       | Invitrogen                | Cat#15557-044    |
| NP-40 substitute                              | Fisher Scientific         | Cat#AAJ19628AP   |
| Formamide                                     | Sigma-Aldrich             | Cat#47671        |
| 16% Formaldehyde solution (w/v) Methanol-free | Thermo Scientific         | Cat#28906        |
| Sodium citrate                                | Calbiochem                | Cat#567446       |
| Dextran sulfate                               | Sigma-Aldrich             | Cat#D8906        |
| Triton-X-100                                  | Sigma-Aldrich             | Cat#T8787        |
| 5M Sodium chloride                            | Promega                   | Cat#V4221        |
| Sodium deoxycholate                           | Sigma-Aldrich             | Cat#D6750        |
| SDS                                           | Bio-Rad                   | Cat#1610302      |
| Tween-20                                      | FisherBiotech             | Cat#BP337        |
| DTT                                           | Thermo Scientific         | Cat#R0861        |
| Skim milk powder                              | BD Biosciences            | Cat#232100       |
| DAPI                                          | Sigma-Aldrich             | Cat#D9542        |
| Doxycycline                                   | Sigma-Aldrich             | Cat#D9891        |
| Cycloheximide                                 | Sigma-Aldrich             | Cat#C1998        |
| Polybrene                                     | Millipore-Sigma           | Cat#TR-1003-G    |
| Lipofectamine LTX                             | Invitrogen                | Cat#15338-100    |
| Viafect transfection reagent                  | Promega                   | Cat#E4981        |
| Trypan-blue 0.4%                              | Invitrogen                | Cat#T10282       |
| Bovine-serum albumin                          | Sigma-Aldrich             | Cat#2930         |
| Glyoxal solution (~40%) in H <sub>2</sub> O   | Sigma-Aldrich             | Cat#50649        |
| Critical commercial assays                    |                           |                  |

|                                                                        |                   |                              |
|------------------------------------------------------------------------|-------------------|------------------------------|
| PureLink Genomic DNA Mini kit                                          | Invitrogen        | Cat#K1820-01                 |
| PureLink RNA Mini kit                                                  | Invitrogen        | Cat#12183018A                |
| SuperScript III Reverse transcriptase                                  | LifeTechnologies  | Cat#11754050                 |
| SYBR Green PCR Master Mix                                              | AppliedBiosystems | Cat#4309155                  |
| SuperSignal West Femto Maximum Sensitivity Substrate                   | Thermo Scientific | Cat#34095                    |
| Protease and phosphatase inhibitors                                    | Thermo Scientific | Cat#78442                    |
| Experimental models: Cell lines                                        |                   |                              |
| Human: U-2 OS cells                                                    | ATCC              | HTB-96                       |
| Human: HEK293T cells                                                   | ATCC              | CRL-3216                     |
| Oligonucleotides                                                       |                   |                              |
| qPCR primer WPRE_F:<br>TGTCGGGGAAATCATCGTCC                            | IDT               | N/A                          |
| qPCR primer WPRE_R:<br>AAGGAAGGTCCGCTGGATTG                            | IDT               | N/A                          |
| qPCR primer TetPromoter_F:<br>AACGTATGTCGAGGTAGGCG                     | IDT               | N/A                          |
| qPCR primer TetPromoter_R:<br>ATTGCTCCAGGCGATCTGAC                     | IDT               | N/A                          |
| qPCR primer Actin_F:<br>GCTACGAGCTGCCTGACG                             | IDT               | N/A                          |
| qPCR primer Actin_R:<br>GGCTGGAAGAGTGCCTCA                             | IDT               | N/A                          |
| 7xCTG FISH probe:<br>Cy3/CTGCTGCTGCTGCTGCTGCTG                         | IDT               | N/A                          |
| MS2 FISH probe:<br>Cy3/TTCTAGAGTCGACCTGCAG                             | IDT               | N/A                          |
| 8xCTG morpholino:<br>CTGCTGCTGCTGCTGCTGCTGCTG                          | GeneTools         | N/A                          |
| Standard intron control morpholino:<br>CCTCTTACCTCAGTTACAATTTATA       | GeneTools         | SKU: PCO-StandardControl-300 |
| Upstream morpholino:<br>CGACGGTGGCCAGGAACCTCATAT                       | GeneTools         | N/A                          |
| Recombinant DNA                                                        |                   |                              |
| CAG <sub>RAN</sub> Lines                                               | This study        | Dataset S1                   |
| CAG <sub>FOCI</sub> Lines                                              | This study        | Dataset S1                   |
| CAG <sub>RAN</sub> ΔMS2                                                | This study        | Dataset S1                   |
| CAG <sub>RAN</sub> ΔMS2, ΔWPRE                                         | This study        | Dataset S1                   |
| mCherry 12xMS2                                                         | (6)               | N/A                          |
| mCherry-revComp 12xMS2                                                 | (6)               | N/A                          |
| CAG repeats with <i>ATXN8</i> flanking sequence:<br>pcDNA3.1 ATXN8 KKQ | (8)               | N/A                          |
| CAG repeats with <i>HTT</i> flanking sequence:<br>pcDNA3.1 HTT         | (8)               | N/A                          |
| CAG repeats with <i>ATXN3</i> flanking sequence:<br>pcDNA3.1 ATXN3     | (8)               | N/A                          |
| MS2 coat protein – YFP fusion:<br>pHR-tdMS2CP-YFP-WPRE                 | (6)               | N/A                          |
| CAG <sub>RAN</sub> -BFP                                                | This study        | Supp. Table 2                |
| CAG <sub>RAN</sub> -Stop-BFP                                           | This study        | Dataset S1                   |
| CAG <sub>RAN</sub> -3xTag                                              | This study        | Dataset S1                   |

|                                                     |                             |                                                                                                                                     |
|-----------------------------------------------------|-----------------------------|-------------------------------------------------------------------------------------------------------------------------------------|
| Lentiviral envelope:<br>pCMV-VSV-G                  | (9)                         | Addgene plasmid<br>#8454                                                                                                            |
| Lentiviral packaging:<br>psPAX2                     | Gift from Didier Trono      | Addgene plasmid<br>#12260                                                                                                           |
| NLS-tdTomato-NES                                    | (10)                        | N/A                                                                                                                                 |
| Software and algorithms                             |                             |                                                                                                                                     |
| ImageJ                                              | (11)                        | <a href="https://imagej.nih.gov/ij/">https://imagej.nih.gov/ij/</a>                                                                 |
| Fusion                                              | Oxford Instruments<br>Andor | <a href="https://andor.oxinst.com/downloads/view/fusion-release-2.3">https://andor.oxinst.com/downloads/view/fusion-release-2.3</a> |
| Other                                               |                             |                                                                                                                                     |
| Dragonfly spinning disk confocal microscope         | Oxford Instruments<br>Andor | Model#Dragonfly505                                                                                                                  |
| iXon Ultra 888 EMCCD camera                         | Oxford Instruments<br>Andor | Model#DU-888U3-CS0-#BV                                                                                                              |
| 100X Oil Immersion Objective, NA 1.45               | Nikon                       | CAT# MRD01905                                                                                                                       |
| 96-well glass bottom plates                         | Brooks                      | CAT# MGB096-1-2-LG-L                                                                                                                |
| iBlot 2                                             | Invitrogen                  | CAT# IB21001                                                                                                                        |
| Countess II FL automated cell counter               | Invitrogen                  | CAT# AMQAF1000                                                                                                                      |
| Countess II disposable cell counting chamber slides | Invitrogen                  | CAT# C10283                                                                                                                         |
| DMEM                                                | Gibco                       | CAT# 11965-126                                                                                                                      |
| Fetal bovine serum                                  | Gibco                       | CAT# 26140-079                                                                                                                      |
| Penicillin-streptomycin-glutamine 100X              | Gibco                       | CAT# 10378016                                                                                                                       |
| Opti-MEM                                            | Gibco                       | CAT# 31985-070                                                                                                                      |
| IMDM                                                | Gibco                       | CAT# 12440-053                                                                                                                      |
| DPBS                                                | Gibco                       | CAT# 14190-144                                                                                                                      |
| Trypsin-EDTA 0.25%                                  | Gibco                       | CAT# 25200-072                                                                                                                      |
| PBS, pH=7.2                                         | Gibco                       | CAT# 20012-027                                                                                                                      |
| Nuclease-free water                                 | Invitrogen                  | CAT# AM9932                                                                                                                         |
| Bovine serum albumin (BSA)                          | Sigma-Aldrich               | CAT# A7906                                                                                                                          |
| 4xBolt LDS sample buffer                            | Invitrogen                  | CAT# B0007                                                                                                                          |
| 4-12% Bis-tris polyacrylamide gel                   | Invitrogen                  | CAT# NW04122                                                                                                                        |

**Movie S1 (separate file). FRAP of cytoplasmic RNA aggregates.**

Time-lapse of cytoplasmic RNA aggregate bleached at  $t = 0$  s. Cells transduced with construct  $CAG_{\text{RAN}}$  were induced for 24 h prior to bleaching. Arrowheads denote photobleached regions. Images are taken at 30 s intervals after bleaching. Scale bar, 10  $\mu\text{m}$ .

**Movie S2 (separate file). Real-time visualization cytoplasmic RNA aggregation.**

Time-lapse movie of cells transduced with  $CAG_{\text{RAN}}$ . Expression of  $CAG_{\text{RAN}}$  construct is induced at time  $t = 0$ . Images show MS2-YFP. Images are taken at 30 min intervals after induction. Scale bar, 10  $\mu\text{m}$ .

**Movie S3 (separate file). FRAP of nuclear RNA foci.**

Time-lapse of cytoplasmic RNA aggregate bleached at  $t = 0$  s. Cells transduced with construct  $CAG_{\text{RAN}}$  were induced for 2 h prior to bleaching. Arrowheads denote photobleached regions. Images are taken at 30 s intervals after bleaching. Scale bar, 10  $\mu\text{m}$ .

**Movie S4 (separate file). Real-time visualization of RNA foci.**

Time-lapse movie of cells transduced with  $CAG_{\text{FOCI}}$ . Expression of  $CAG_{\text{FOCI}}$  construct is induced at time  $t = 0$ . Images show MS2-YFP. Images are taken at 30 min intervals after induction. Scale bar, 10  $\mu\text{m}$ .

**Movie S5 (separate file). Real-time visualization of RAN translation and RNA aggregation.**

Time-lapse movie of cells transduced with  $CAG_{\text{RAN}}$ -BFP translation reporter. Expression of  $CAG_{\text{RAN}}$ -BFP construct is induced at time  $t = 0$ . Images show composite (cyan) of

MS2-YFP (green) and BFP (blue) channels. Images are taken at 30 min intervals after induction. Scale bar, 10  $\mu$ m.

### **Dataset S1 (separate file). Full sequences of plasmids generated.**

### **SI References**

1. E. Bertrand, *et al.*, Localization of ASH1 mRNA particles in living yeast. *Mol. Cell* **2**, 437–445 (1998).
2. J. F. Garcia, R. Parker, Ubiquitous accumulation of 3' mRNA decay fragments in *Saccharomyces cerevisiae* mRNAs with chromosomally integrated MS2 arrays. *RNA* **22**, 657–659 (2016).
3. E. Tutucci, *et al.*, An improved MS2 system for accurate reporting of the mRNA life cycle. *Nat. Methods* **15**, 81–89 (2018).
4. G. Haimovich, *et al.*, Use of the MS2 aptamer and coat protein for RNA localization in yeast: A response to “MS2 coat proteins bound to yeast mRNAs block 5' to 3' degradation and trap mRNA decay products: implications for the localization of mRNAs by MS2-MCP system.” *RNA* **22**, 660–666 (2016).
5. J. F. Garcia, R. Parker, MS2 coat proteins bound to yeast mRNAs block 5' to 3' degradation and trap mRNA decay products: implications for the localization of mRNAs by MS2-MCP system. *RNA* **21**, 1393–1395 (2015).
6. A. Jain, R. D. Vale, RNA phase transitions in repeat expansion disorders. *Nature* **546**, 243–247 (2017).
7. D. A. Zacharias, J. D. Violin, A. C. Newton, R. Y. Tsien, Partitioning of Lipid-Modified Monomeric GFPs into Membrane Microdomains of Live Cells. *Science* **296**, 913–916 (2002).
8. T. Zu, *et al.*, Non-ATG-initiated translation directed by microsatellite expansions. *Proc. Natl. Acad. Sci.* **108**, 260–265 (2011).
9. S. A. Stewart, *et al.*, Lentivirus-delivered stable gene silencing by RNAi in primary cells. *RNA N. Y.* **9**, 493–501 (2003).
10. H. Zhang, *et al.*, RNA Controls PolyQ Protein Phase Transitions. *Mol. Cell* **60**, 220–230 (2015).
11. C. A. Schneider, W. S. Rasband, K. W. Eliceiri, NIH Image to ImageJ: 25 years of image analysis. *Nat. Methods* **9**, 671–675 (2012).
